# Supplementary material for: A Combination of Artificial Intelligence with Genetic Algorithms on Static Time-Lapse Images Improves Consistency in Blastocyst Assessment, An Interpretable Tool to Automate Human Embryo Evaluation: A Retrospective Cohort Study
Source: PubMed Central journal article supplement — Int J Fertil Steril. 2024 Oct 30;18(4):378–83. doi: 10.22074/ijfs.2024.2008339.1510 (PMC11589968; doi:10.22074/ijfs.2024.2008339.1510), 2024-10-30
Supplement: Int-J-Fertil-Steril-18-378-s01.pdf [file Int-J-Fertil-Steril-18-378-s01.pdf]

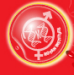

# A Combination of Artificial Intelligence with Genetic Algorithms on Static Time-Lapse Images Improves Consistency in Blastocyst Assessment, An Interpretable Tool to Automate Human Embryo Evaluation: A Retrospective Cohort Study

Marco Toschi, M.Sc.<sup>1</sup>, Lorena Bori, Ph.D.<sup>2\*</sup> , Jose Celso Rocha, Ph.D.<sup>3</sup>, Cristina Hickman, Ph.D.<sup>4</sup>, Marcelo Fábio Gouveia Nogueira, Ph.D.<sup>3</sup>, André Satoshi Ferreira, Ph.D.<sup>3</sup>, Murilo Costa Maffei, Ph.D.<sup>3</sup>, Jonas Malmsten, Ph.D.<sup>5</sup>, Qiansheng Zhan, Ph.D.<sup>5</sup>, Nikica Zaninovic, Ph.D.<sup>5</sup>, Marcos Meseguer, Ph.D.<sup>6</sup>

1. IVIRMA Global Research Alliance, IVIRMA Roma, Italy
2. IVIRMA Global Research Alliance, IVI Foundation, Instituto de Investigación Sanitaria La Fe (IIS La Fe), Valencia, Spain
3. Universidade Estadual Paulista (Unesp), Faculdade de Ciências e Letras, Câmpus de Assis SP, Brazil
4. Aria Fertility, London, UK
5. Ronald O Perelman and Claudia Cohen Center for Reproductive Medicine, Weill Cornell Medicine, New York, NY, USA
6. IVIRMA Global Research Alliance, IVIRMA Valencia, Spain

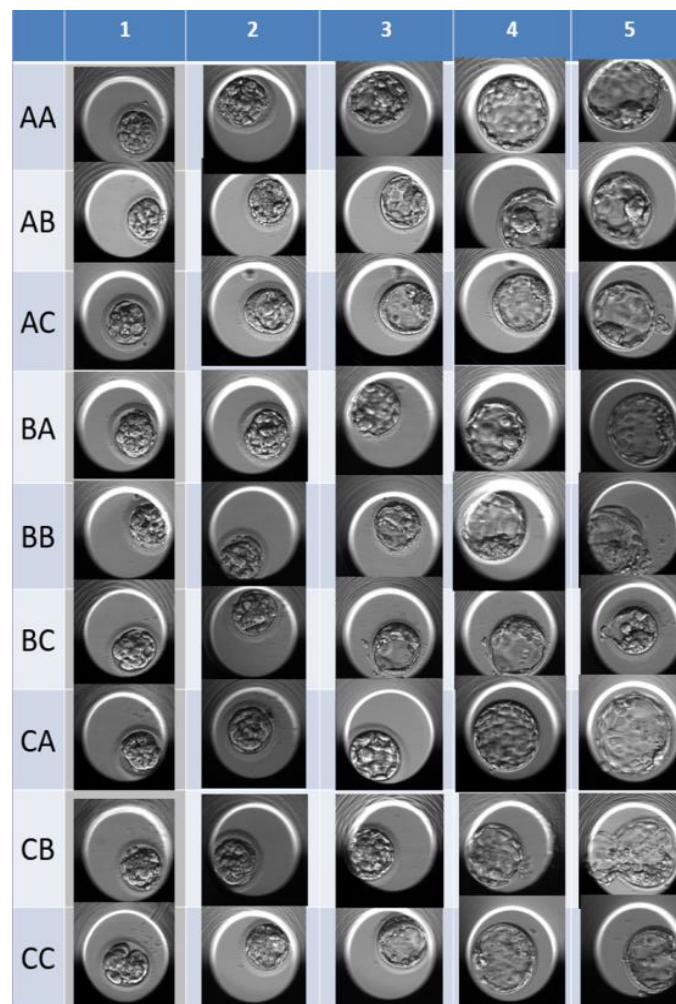

Fig.S1: Blastocyst time-lapse images representing the Gardner Grading System on day 5 of embryo development.

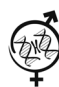

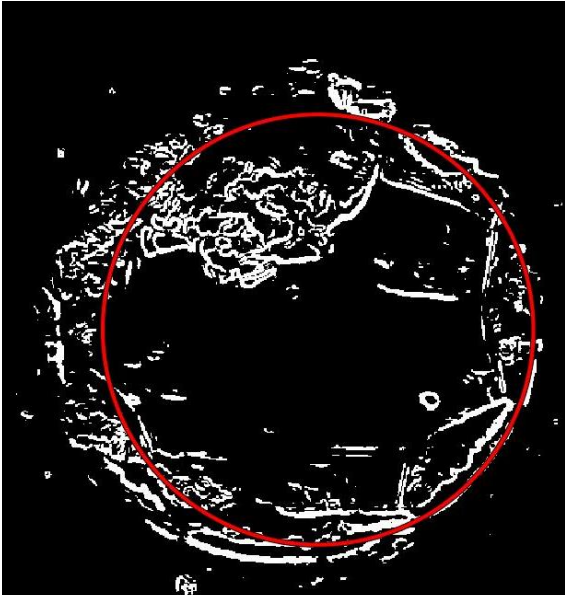

**Fig.S2:** Blastocyst image showing the standardization of a human embryo image. To ensure the contrast and consistency of the image, 1% of all information is saturates between light and dark pixels.

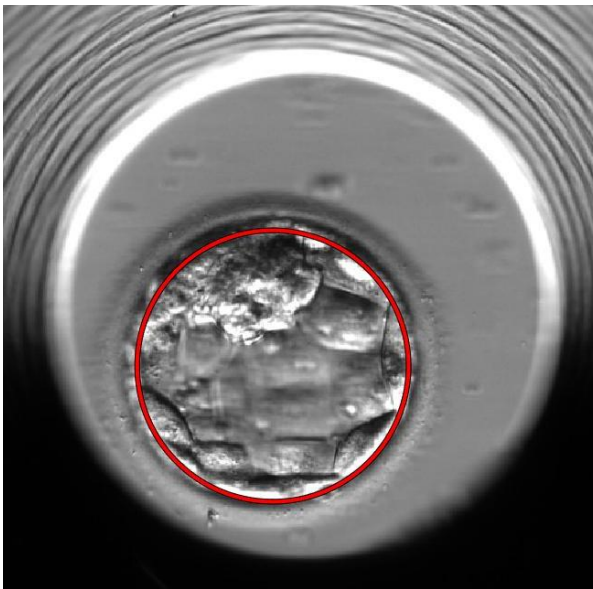

**Fig.S3:** Isolated human blastocyst with Hough's function to determine the circumference that best characterizes the embryo.

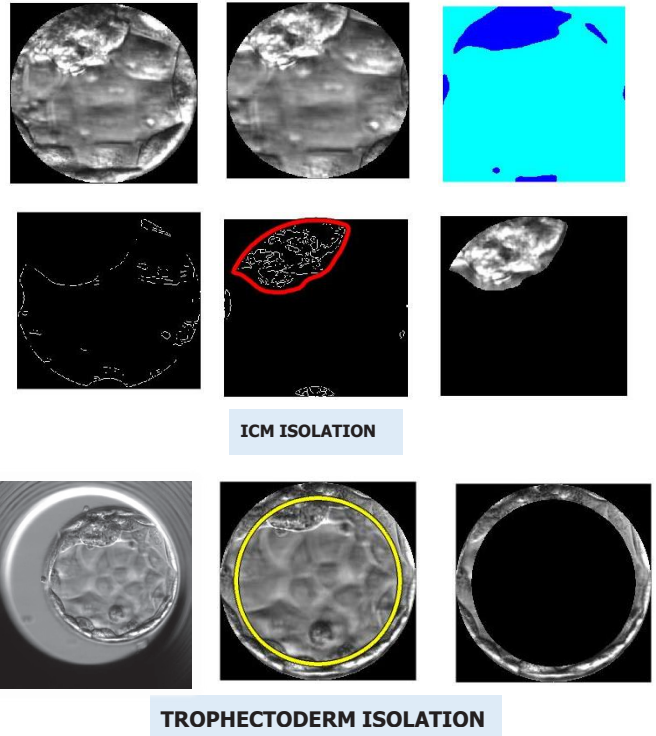

**Fig.S4:** Sequence of steps required to segment a digital image from the human blastocyst.
